# Supplementary material for: Real-World Evaluation of Quality of Life, Effectiveness, and Safety of Aflibercept Plus FOLFIRI in Patients with Metastatic Colorectal Cancer: The Prospective QoLiTrap Study
Source: MDPI journal article supplement (doi:10.3390/cancers14143522), 2022-07-20
Supplement: s1 [file s1]

**Supplementary Table S1.** Patient disposition in terms of completion of EORTC QLQ-C30. EORTC QLQ-C30, European Organization for the Research and Treatment of Cancer Core Quality of Life Questionnaire.

| <b>Cycle number</b> | <b>Number of patients who completed the questionnaire per cycle, <i>n/N</i> (%)<br/>(<i>N</i>=1277)</b> |
|---------------------|---------------------------------------------------------------------------------------------------------|
| Cycle 1 (baseline)  | 852/1276 (66.8)                                                                                         |
| Cycle 2             | 811/1178 (68.8)                                                                                         |
| Cycle 3             | 822/1070 (76.8)                                                                                         |
| Cycle 4             | 731/946 (77.3)                                                                                          |
| Cycle 5             | 615/819 (75.1)                                                                                          |
| Cycle 6             | 546/718 (76.0)                                                                                          |
| Cycle 7             | 422/576 (73.3)                                                                                          |
| Cycle 8             | 373/483 (77.2)                                                                                          |
| Cycle 9             | 310/421 (73.6)                                                                                          |
| Cycle 10            | 281/384 (75.0)                                                                                          |
| Cycle 11            | 240/321 (76.0)                                                                                          |
| Cycle 12            | 203/279 (72.8)                                                                                          |
| Cycle 13            | 161/217 (74.2)                                                                                          |

**Supplementary Table S2.** Factors associated with an improved GHS score, as assessed by univariate (2A) and multivariate (2B) analysis. ECOG PS, Eastern Cooperative Oncology Group performance status; GHS, global health status.

## 2A Univariate analysis

| Parameter                               | Odds Ratio  | 95% CI              | <i>p</i> -value |
|-----------------------------------------|-------------|---------------------|-----------------|
| ECOG PS<br>0-1<br>≥ 2                   | Ref<br>6.57 | -<br>[4.11 - 10.48] | -<br><0.0001    |
| Hematological toxicity<br>No<br>Yes     | Ref<br>3.79 | -<br>[2.86 - 5.01]  | -<br><0.0001    |
| Objective tumor response<br>No<br>Yes   | Ref<br>2.47 | -<br>[1.76 - 3.48]  | -<br><0.0001    |
| Preexisting symptoms<br>No<br>Yes       | Ref<br>0.93 | -<br>[0.68 - 1.23]  | -<br><0.0001    |
| Non-hematological toxicity<br>No<br>Yes | Ref<br>0.85 | -<br>[0.65 - 1.11]  | -<br>0.22       |
| Age<br>< 60 years<br>≥ 60 years         | Ref<br>0.52 | -<br>[0.40 - 0.68]  | -<br><0.0001    |

## 2B multivariate analysis

| Parameter                           | Odds Ratio  | 95% CI             | <i>p</i> -value |
|-------------------------------------|-------------|--------------------|-----------------|
| ECOG PS<br>0-1<br>≥ 2               | Ref<br>4.94 | -<br>[2.60 - 9.41] | -<br>0.0020     |
| Hematological toxicity<br>No<br>Yes | Ref<br>1.71 | -<br>[1.14 - 2.55] | -<br>0.0095     |

**Supplementary Table S3.** Adverse events that occurred in  $\geq 3\%$  of patients treated with aflibercept plus FOLFIRI (n=1277). FOLFIRI, fluorouracil (5-FU), folinic acid, irinotecan.

| <b>Patients</b>                       | <b>All grades, <i>n</i> (%)</b> | <b>Grade <math>\geq 3</math>, <i>n</i> (%)</b> |
|---------------------------------------|---------------------------------|------------------------------------------------|
| Any adverse event                     | 1056 (82.7)                     | 666 (52.2)                                     |
| Diarrhea                              | 437 (34.2)                      | 86 (6.7)                                       |
| Fatigue/ asthenia                     | 227 (17.8)                      | 18 (1.4)                                       |
| Nausea                                | 228 (17.9)                      | 14 (1.1)                                       |
| Stomatitis                            | 219 (17.2)                      | 50 (3.9)                                       |
| Hypertension                          | 148 (11.6)                      | 118 (9.3)                                      |
| Decreased white blood cell count      | 116 (9.1)                       | 43 (3.4)                                       |
| General physical health deterioration | 106 (8.3)                       | 62 (4.9)                                       |
| Weight loss                           | 98 (7.7)                        | 2 (0.2)                                        |
| Decreased appetite                    | 94 (7.4)                        | 8 (0.6)                                        |
| Vomiting                              | 93 (7.3)                        | 12 (0.9)                                       |
| Abdominal pain                        | 91 (7.1)                        | 14 (1.1)                                       |
| Dyspnea                               | 84 (6.6)                        | 20 (1.6)                                       |
| Anemia                                | 58 (4.8)                        | 17 (1.3)                                       |
| Peripheral sensory neuropathy         | 54 (4.2)                        | 3 (0.2)                                        |
| Neutrophil count decreased            | 54 (4.2)                        | 30 (2.3)                                       |
| Platelet count decreased              | 54 (4.2)                        | 10 (0.8)                                       |
| Pyrexia                               | 53 (4.2)                        | 4 (0.3)                                        |
| Headache                              | 51 (4.0)                        | 2 (0.2)                                        |
| Constipation                          | 48 (3.8)                        | 2 (0.2)                                        |
| Epistaxis                             | 45 (3.5)                        | 1 (0.1)                                        |
| Pain                                  | 43 (3.4)                        | 4 (0.4)                                        |
| Proteinuria                           | 43 (3.4)                        | 9 (0.7)                                        |
| Dehydration                           | 42 (3.3)                        | 16 (1.3)                                       |
| Back pain                             | 39 (3.1)                        | 7 (0.5)                                        |
| Neoplasm progression                  | 41 (3.2)                        | 39 (3.1)                                       |
| Dysphonia                             | 39 (3.1)                        | 3 (0.2)                                        |

**Supplementary Table S4**

The names of the QoLiTrap investigators, listed by country.

| Last name          | First name    | Country |
|--------------------|---------------|---------|
| Enökl-Tomantschger | Ute           | Austria |
| Greil              | Richard       | Austria |
| Grünberger         | Birgit        | Austria |
| Korger             | Markus        | Austria |
| Meran              | Johannes      | Austria |
| Muellner-Ammer     | Kirsten       | Austria |
| Popescu            | Razvan        | Austria |
| Prager             | Gerald        | Austria |
| Rossmann           | Dieter        | Austria |
| Thaler             | Josef         | Austria |
| Tinchon            | Christoph     | Austria |
| Abenhardt          | Wolfgang      | Germany |
| Anhut              | Peter         | Germany |
| Assmann            | Michael       | Germany |
| Baake              | Gerold        | Germany |
| Balleisen          | Jan Sebastian | Germany |
| Balser             | Christina     | Germany |
| Banhardt           | Ulrich        | Germany |
| Basovski           | Leonid        | Germany |
| Becker             | Cornelia      | Germany |
| Behringer          | Dirk          | Germany |
| Benz               | Jutta         | Germany |
| Bergmann           | Friedrich     | Germany |
| Bischoff           | Marina        | Germany |
| Blau               | Wolfgang      | Germany |
| Blumenstengel      | Klaus         | Germany |
| Bolling            | Claus         | Germany |
| Brandl             | Stephan       | Germany |
| Bremer             | Anne          | Germany |
| Brinkmann          | Lutz          | Germany |
| Broszeit-Luft      | Stefanie      | Germany |
| Burkhard-Meier     | Ulrike        | Germany |
| Bürkle             | Dieter        | Germany |
| Däßler             | Klaus-Ulrich  | Germany |
| Denzlinger         | Claudio       | Germany |
| Depenbusch         | Reinhard      | Germany |
| Derigs             | H. Guenter    | Germany |
| Diener             | Christian     | Germany |
| Dresemann          | Gregor        | Germany |
| Dworzanski         | Regina        | Germany |
| Edelmann           | Thomas        | Germany |
| Egert              | Matthias      | Germany |
| Eggers             | Egbert        | Germany |
| Ehrig              | Johannes      | Germany |
| Eichstaedt         | Martina       | Germany |

|                  |                 |         |
|------------------|-----------------|---------|
| Eisel            | Wolfgang        | Germany |
| Eschenburg       | Henning         | Germany |
| Fechner          | Lars            | Germany |
| Fenchel          | Klaus           | Germany |
| Flieger          | Dimitri         | Germany |
| Fries            | Stefan          | Germany |
| Fritz            | Markus          | Germany |
| Fronhoffs        | Stefan          | Germany |
| Fuchs            | Roswitha        | Germany |
| Gabius           | Sigrun          | Germany |
| Garlipp          | Benjamin        | Germany |
| Gaska            | Tobias          | Germany |
| Geer             | Thomas          | Germany |
| Gerl             | Arthur          | Germany |
| Giagounidis      | Aristoteles     | Germany |
| Göhler           | Thomas          | Germany |
| Golf             | Alexander       | Germany |
| Graf             | Nicolas         | Germany |
| Groschek         | Matthias        | Germany |
| Grundeis         | Marc            | Germany |
| Grunewald        | Ralf            | Germany |
| Güller           | Ulrich          | Germany |
| Haas             | Siegfried       | Germany |
| Hacker           | Ulrich          | Germany |
| Haessner         | Joachim         | Germany |
| Hahn             | Lars            | Germany |
| Hansen           | Richard         | Germany |
| Hartmann         | Frank           | Germany |
| Heinrich         | Bernhard Jürgen | Germany |
| Helbling         | Daniel          | Germany |
| Hempel           | Dirk            | Germany |
| Herb             | Siegbert        | Germany |
| Hering-Schubert  | Christiane      | Germany |
| Hessling         | Jörg            | Germany |
| Höblinger        | Aksana          | Germany |
| Höffkes          | Heinz-Gert      | Germany |
| Hoffmann         | Thomas          | Germany |
| Illerhaus        | Gerald          | Germany |
| Immenschuh       | Peter           | Germany |
| Jäckle           | Jürgen          | Germany |
| Jacobasch        | Lutz            | Germany |
| Janssen          | Jan             | Germany |
| Josting          | Andreas         | Germany |
| Just             | Marianne        | Germany |
| Käfer            | Gabriele        | Germany |
| Keitel-Anselmino | Verena          | Germany |
| Kessler          | Christina       | Germany |
| Klaproth         | Holger          | Germany |
| Klausmann        | Martine         | Germany |
| Kleiss           | Mathias         | Germany |

|                   |                 |         |
|-------------------|-----------------|---------|
| Klump             | Bodo            | Germany |
| Ko                | Yon-Dschun      | Germany |
| Koch              | Bernhard        | Germany |
| Koenigsmann       | Michael         | Germany |
| Kohl              | Detlev          | Germany |
| Krammer-Steiner   | Beate           | Germany |
| Kreher            | Stephan         | Germany |
| Kretzschmar       | Albrecht        | Germany |
| Kröning           | Hendrik         | Germany |
| Kühn              | Gunhild         | Germany |
| Kullmann          | Frank           | Germany |
| Lamberti          | Christof        | Germany |
| Lebahn            | Herbert         | Germany |
| Lebahn            | Herbert         | Germany |
| Lehenbauer-Dehm   | Silvia          | Germany |
| Leithäuser        | Malte           | Germany |
| Limmroth          | Christina       | Germany |
| Losem             | Christoph       | Germany |
| Lüdtke-Heckenkamp | Kerstin         | Germany |
| Maier-Bay         | Birgit          | Germany |
| Mainka            | Dieter          | Germany |
| Maintz            | Christoph       | Germany |
| Maintz            | Oliver          | Germany |
| Martin            | Kerstin         | Germany |
| Maschmeyer        | Georg           | Germany |
| Mayer             | Frank           | Germany |
| Maywald           | Ole             | Germany |
| Menzel            | Josef           | Germany |
| Meyer             | Dirk            | Germany |
| Michl             | Gerlinde        | Germany |
| Moebius           | Elke            | Germany |
| Mohm              | Johannes        | Germany |
| Möller            | Marcel          | Germany |
| Müller            | Gudrun          | Germany |
| Müller            | Christian       | Germany |
| Musch             | Reinhard        | Germany |
| Neise             | Michael         | Germany |
| Oetzel            | Carsten         | Germany |
| Öhler             | Leopold         | Germany |
| Ohmenhäuser       | Axel            | Germany |
| Opitz             | Bernhard Martin | Germany |
| Otremba           | Burkhard        | Germany |
| Papke             | Jens            | Germany |
| Petersen          | Volker          | Germany |
| Peuser            | Bettina         | Germany |
| Pistorius         | Uwe             | Germany |
| Rauh              | Jacqueline      | Germany |
| Ritter            | Ute             | Germany |
| Roitner           | Florian         | Germany |
| Rubanov           | Oleg            | Germany |

|                   |                |         |
|-------------------|----------------|---------|
| Rudi              | Jochen         | Germany |
| Ruffert           | Klaus          | Germany |
| Sahm              | Stephan        | Germany |
| Salat             | Christoph Tore | Germany |
| Sandner           | Reiner         | Germany |
| Sauer             | Annette        | Germany |
| Schaich           | Markus         | Germany |
| Schardt           | Christof       | Germany |
| Schauenberg       | Philipp        | Germany |
| Scheuer           | Burkhard       | Germany |
| Schmid            | Mathias        | Germany |
| Schmitt           | Karla          | Germany |
| Schmitz           | Marion         | Germany |
| Schmitz           | Stephan        | Germany |
| Schröder          | Jan            | Germany |
| Schröder          | Detlev         | Germany |
| Schubring         | Markus         | Germany |
| Schüler           | Frank          | Germany |
| Schulz            | Holger         | Germany |
| Schulz-Abelius    | Armin          | Germany |
| Schulze           | Mathias        | Germany |
| Schulze-Bergkamen | Henning        | Germany |
| Schütz            | Stefan         | Germany |
| Schwarz           | Maik           | Germany |
| Schweigert        | Marcus         | Germany |
| Schweinitz        | Cornelia       | Germany |
| Schweizer         | Christof       | Germany |
| Schwerdtfeger     | Michael        | Germany |
| Schwinger         | Ulrike         | Germany |
| Schwittay         | Michael        | Germany |
| Seipelt           | Gernot         | Germany |
| Siegler           | Gabriele       | Germany |
| Söling            | Ulrike         | Germany |
| Spohn             | Claudia        | Germany |
| Stauch            | Martina        | Germany |
| Stern             | Sieglinde      | Germany |
| Tebbe             | Sandra         | Germany |
| Tischbirek        | Klaus          | Germany |
| Titgemeyer        | Jan            | Germany |
| Tschechne         | Barbara        | Germany |
| Uhlig             | Jens           | Germany |
| Valdix            | Annette-Rosel  | Germany |
| Vehling-Kaiser    | Ursula         | Germany |
| Waberzeck         | Brigitte       | Germany |
| Welslau           | Manfred        | Germany |
| Whitlock          | Bettina        | Germany |
| Wiegand           | Jörg           | Germany |
| Wilke             | Jochen         | Germany |
| Wolff             | Thomas         | Germany |
| Wortmann          | Anke           | Germany |

|                   |             |             |
|-------------------|-------------|-------------|
| Wullstein-Winkler | Felix       | Germany     |
| Wuttke            | Patricia    | Germany     |
| Zahn              | Mark-Oliver | Germany     |
| Zander            | Ingo        | Germany     |
| Zeth              | Matthias    | Germany     |
| Ziske             | Carsten     | Germany     |
| Anchisi           | Sandro      | Switzerland |
| Betticher         | Daniel      | Switzerland |
| Bohanes           | Pierre      | Switzerland |
| Kühne             | Reto        | Switzerland |
| Moosmann          | Peter       | Switzerland |
| Pederiva          | Stefanie    | Switzerland |
| von Moos          | Roger       | Switzerland |
| Zenhäusern        | Reinhard    | Switzerland |
