# Supplementary figures and images for: Real-World Evaluation of Quality of Life, Effectiveness, and Safety of Aflibercept Plus FOLFIRI in Patients with Metastatic Colorectal Cancer: The Prospective QoLiTrap Study
Source: MDPI journal article supplement (doi:10.3390/cancers14143522), 2022-07-20

**Supplementary Figure S1**

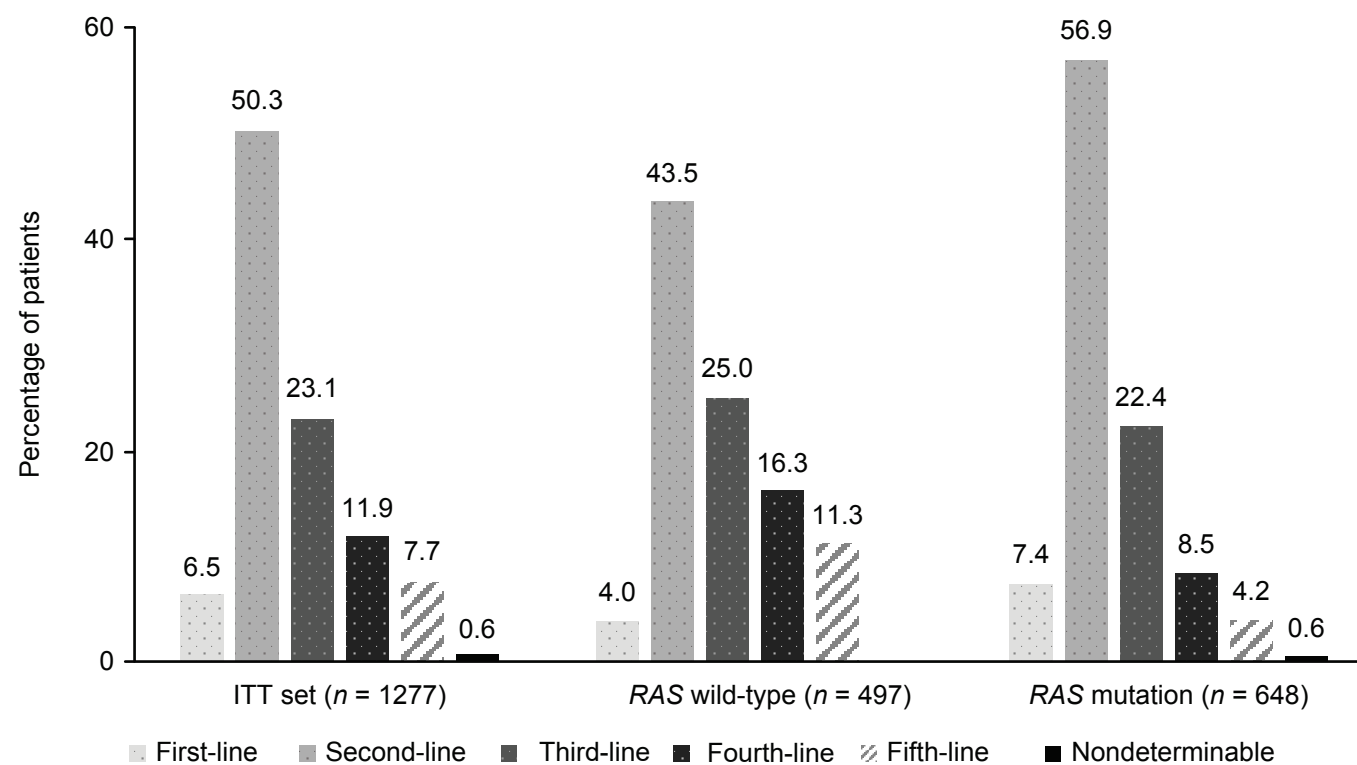

## Supplementary Figure S2

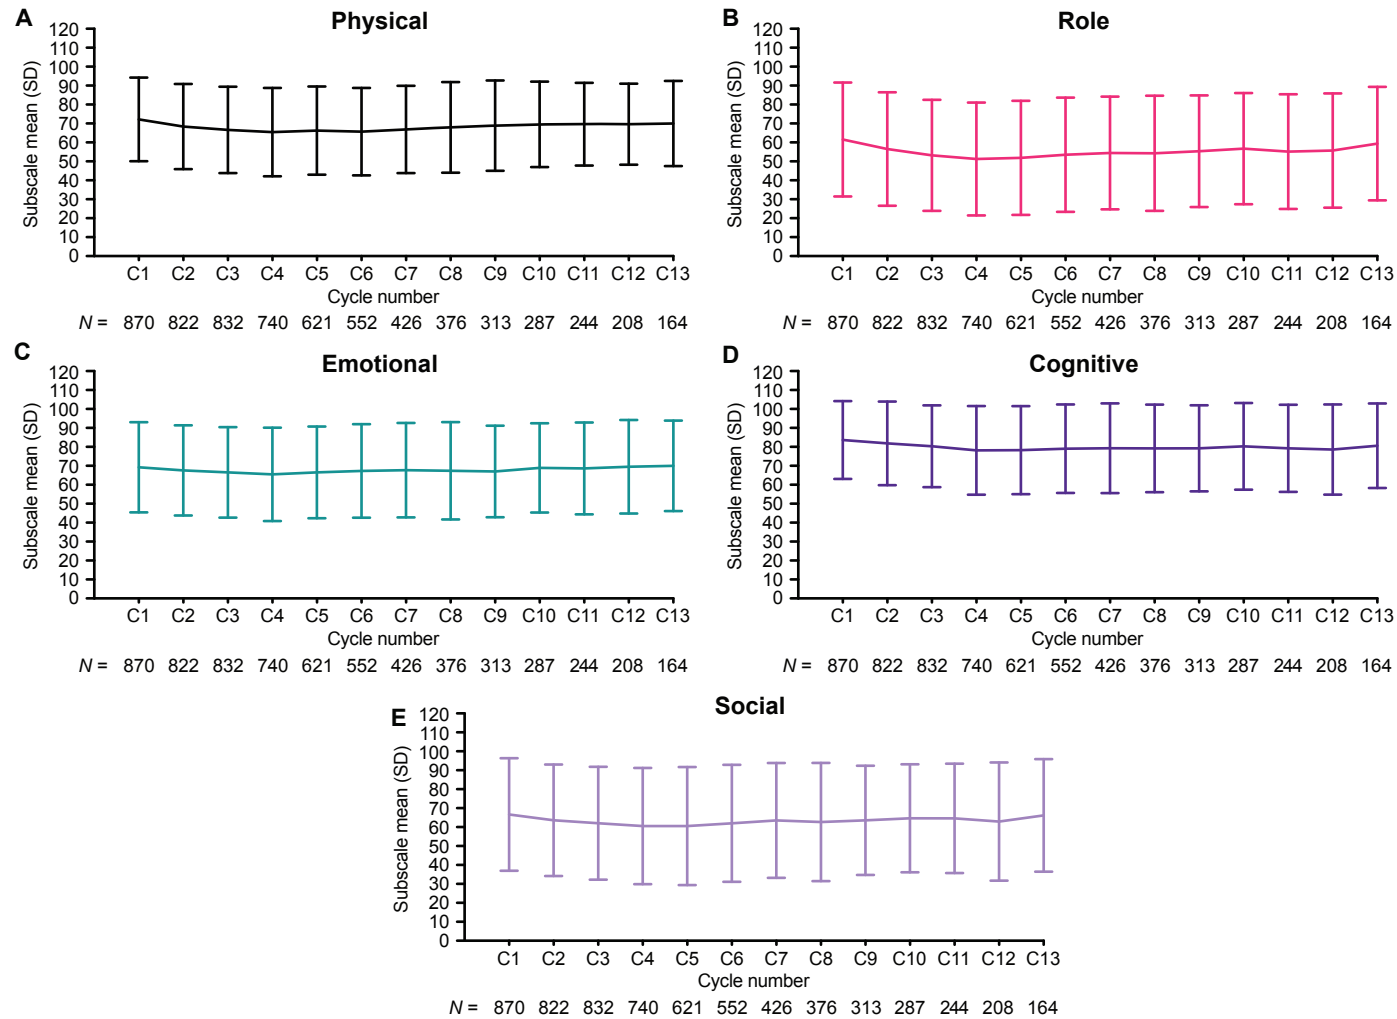

## Supplementary Figure S3

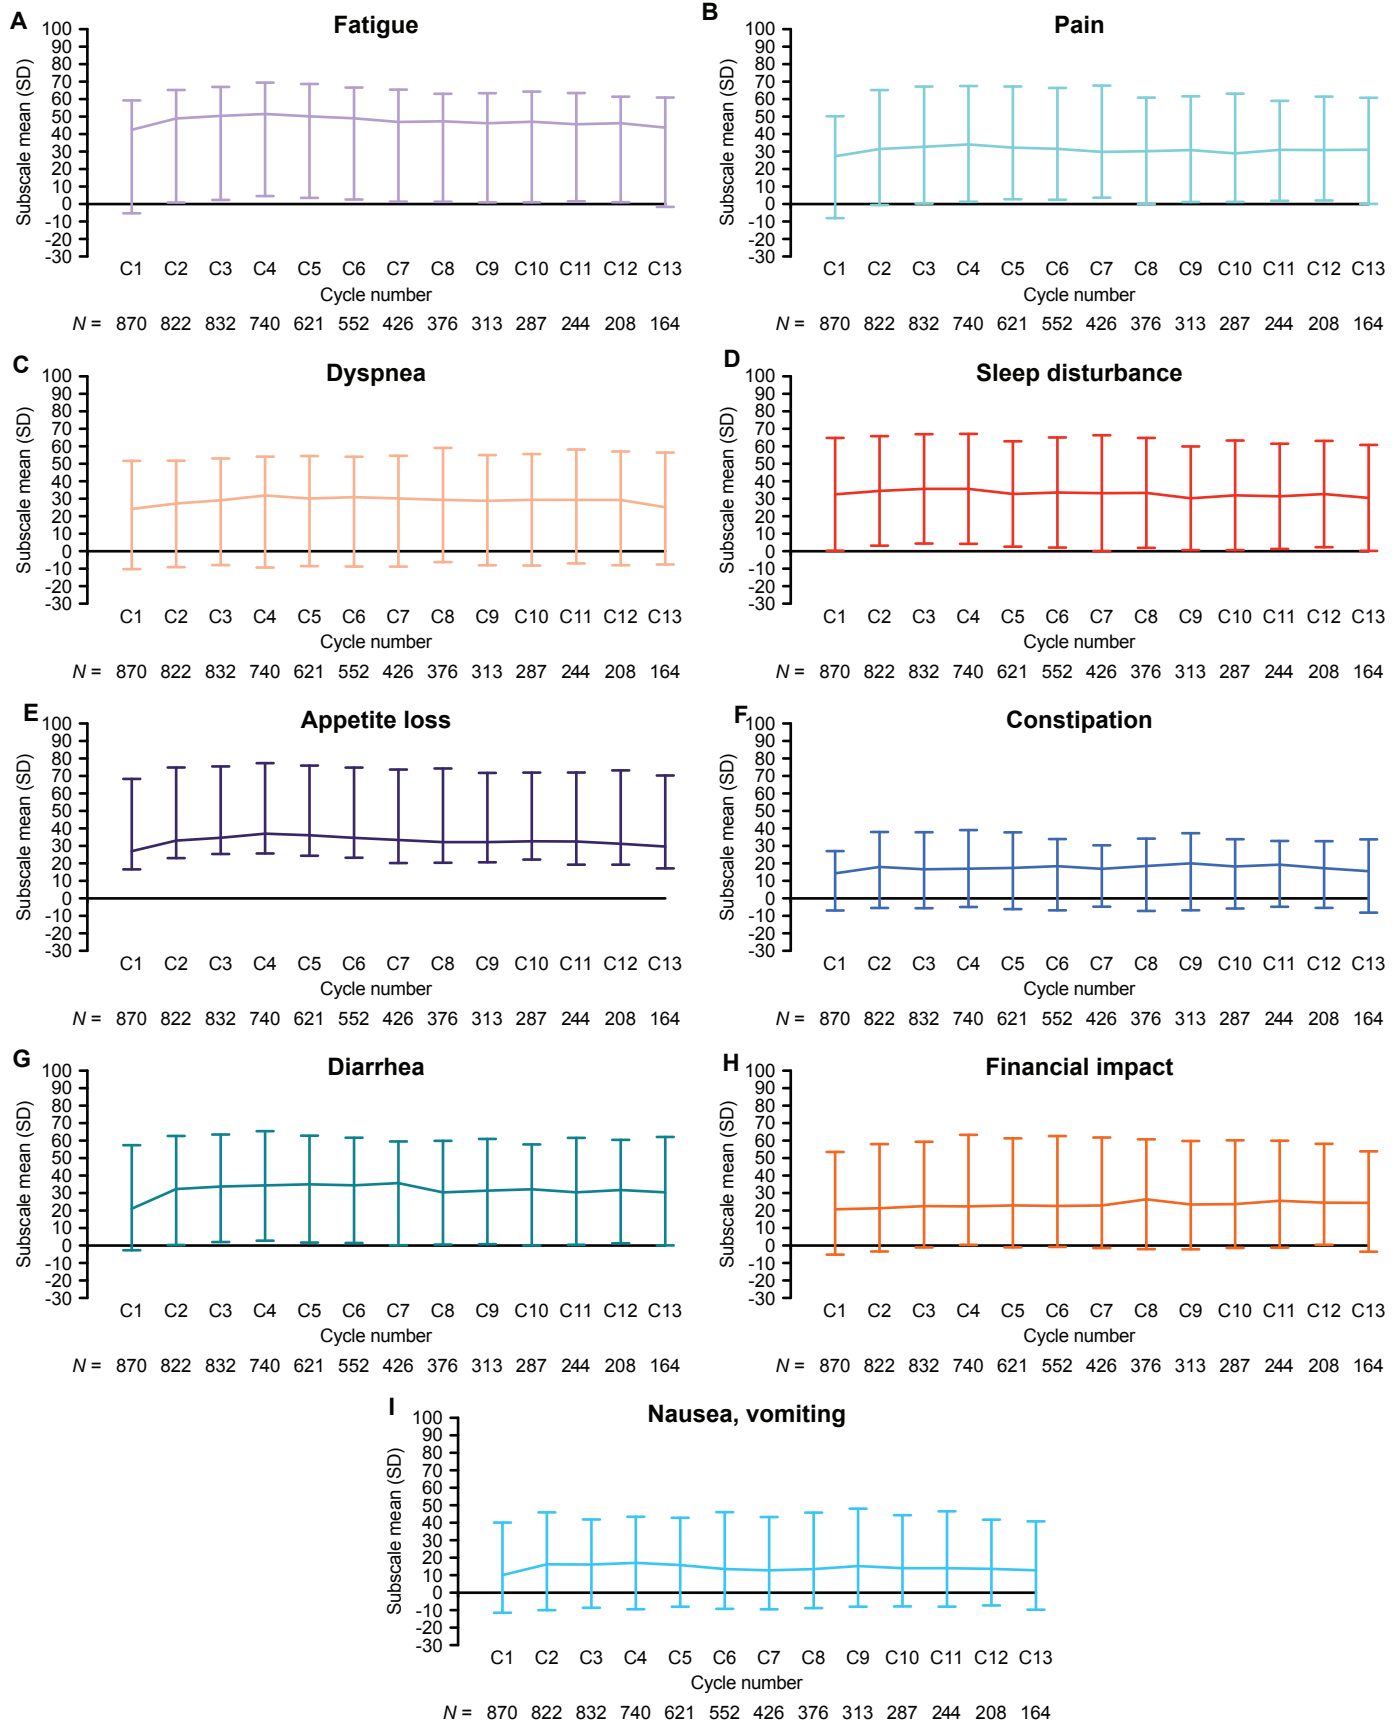

Supplement: s1 [file s1]
